# Supplementary material for: A Review of Daclatasvir Drug–Drug Interactions
Source: PubMed Central journal article supplement — Adv Ther. 2016 Sep 23;33(11):1867–84. doi: 10.1007/s12325-016-0407-5 (PMC5083780; doi:10.1007/s12325-016-0407-5), 2016-09-23
Supplement: 12325_2016_407_MOESM1_ESM.pdf [file 12325_2016_407_MOESM1_ESM.pdf]

**BMS HIGHLY CONFIDENTIAL**

**SUPPLEMENTARY MATERIALS**

**Table S1** An overview of described study characteristics

| <b>Study/Country</b>         | <b>Design</b>                                                                                | <b>Study Participants</b>    | <b>Dose/Route/Duration</b>                                                                                                                                                                                                                                                                                      |
|------------------------------|----------------------------------------------------------------------------------------------|------------------------------|-----------------------------------------------------------------------------------------------------------------------------------------------------------------------------------------------------------------------------------------------------------------------------------------------------------------|
| AI444-005/<br>USA            | Open-label, non-randomized, single-sequence study                                            | Healthy (N = 14)             | DCV 10 mg capsule/PO/single dose on Days 1 and 9; ketoconazole 400 mg tablet/PO/QD on Days 5–13.                                                                                                                                                                                                                |
| AI444-008/<br>USA            | Open-label, non-randomized, single-sequence study                                            | Healthy (N = 18)             | DCV 60 mg/PO/QD on Days 2–6; midazolam 5 mg/PO/QD on Days 1 and 6.                                                                                                                                                                                                                                              |
| AI444-009/<br>USA            | Open-label, randomized, 5-period, 5-treatment, crossover study                               | Healthy (N = 18)             | Included: DCV 60 mg (6 × dry granulated 10 mg formulation) with (2-hours post-dose) or without famotidine 40 mg administered under fasted conditions.                                                                                                                                                           |
| AI444-012/<br>Korea          | Open-label, single sequence, 1-way interaction study                                         | Healthy (N = 14)             | DCV 60 mg/PO/QD on Days 1 and 10; rifampin 600 mg/PO/QD on Days 3–11.                                                                                                                                                                                                                                           |
| AI444-020/<br>USA and Canada | Open-label, 3-cycle, single-sequence study                                                   | Healthy WOCBP (N = 20)       | DCV 60 mg/PO/QD on Days 68–77; Ortho Tri-Cyclen®/PO/QD on Days 1–77.                                                                                                                                                                                                                                            |
| AI444-024/<br>USA            | Open-label, randomized study                                                                 | Healthy (N = 24; 12 per arm) | DCV 20 mg (Arm 1) or 60 mg (Arm 2)/PO/QD on Days 1 and 8; omeprazole 40 mg/PO/QD on Days 3–9.                                                                                                                                                                                                                   |
| AI444-027/<br>USA            | Open-label, 2-treatment, single-sequence, multiple-dose, one-way interaction study           | Healthy (N = 17)             | Digoxin 0.125 mg/PO/QD on Days 1–20; DCV 60 mg/PO/QD on Days 11–20.                                                                                                                                                                                                                                             |
| AI444-032/<br>USA            | Open-label, two-treatment, single-sequence crossover, one-way interaction study              | Healthy (N = 14)             | DCV 60 mg (2 × 30 mg tablets)/PO/QD on Days 1–14; atazanavir/ritonavir 300/100 mg/PO/QD on Days 5–14.                                                                                                                                                                                                           |
| AI444-033/<br>USA            | Open-label, 3-treatment, randomized, multiple-dose, 3-way crossover, 2-way interaction study | Healthy (N = 21)             | Treatment A: DCV 60 mg/PO/QD;<br>Treatment B: tenofovir 300 mg/PO/QD;<br>Treatment C: DCV 60 mg + tenofovir 300 mg/PO/QD.<br>Each treatment was administered after a light breakfast for 7 days.                                                                                                                |
| AI444-034/<br>USA            | Open-label, three-treatment, single-sequence, multiple-dose, one-way interaction study       | Healthy (N = 17)             | Treatment A: DCV 60 mg /PO/QD on Days 1–4<br>Treatment B: Efavirenz 600 mg /PO/QD (administered in the evening) + DCV 60 mg /PO/QD administered in the morning on Days 5–13<br>Treatment C: Efavirenz 600 mg /PO/QD (administered in the evening) + DCV 120 mg /PO/QD administered in the morning on Days 14–18 |

**BMS HIGHLY CONFIDENTIAL**

|                             |                                                                               |                                                                                        |                                                                                                                                                                     |
|-----------------------------|-------------------------------------------------------------------------------|----------------------------------------------------------------------------------------|---------------------------------------------------------------------------------------------------------------------------------------------------------------------|
| AI444-043/<br>Multinational | Open-label, phase 3 efficacy and safety study                                 | HIV/HCV co-infected patients on stable DRV/r ( <i>n</i> = 11) or LPV/r ( <i>n</i> = 6) | Patients receiving stable DRV/r (600/100 mg BID) or LPV/r (400/100 mg BID) received DCV 30 mg QD (+pegIFN/RBV).                                                     |
| AI444-054/<br>USA           | Open-label, 3-treatment, single-sequence, 1-way interaction study             | Healthy subjects ( <i>N</i> = 22)                                                      | Rosuvastatin 10 mg/PO/QD on Days 1 and 10–13; DCV 60 mg/PO/QD on Days 10–13.                                                                                        |
| AI444-064/<br>USA           | Open-label, 2-part, 1-way study                                               | Healthy subjects ( <i>N</i> = 14)                                                      | Stable-dose methadone or buprenorphine/naloxone on Days 1–9; DCV 60 mg/PO/QD on Days 2–9.                                                                           |
| AI444-065/<br>USA           | Open-label, single-sequence study                                             | Healthy subjects ( <i>N</i> = 28)                                                      | Group 1: cyclosporine 400 mg/PO/QD on Days 1 and 9; DCV 60 mg/PO/QD on Days 4–11.<br>Group 2: tacrolimus 5 mg/PO/QD on Days 1 and 13; DCV 60 mg/PO/QD on Days 8–19. |
| AI444-067/<br>Japan         | Open-label, uncontrolled study                                                | Healthy subjects ( <i>N</i> = 30)                                                      | Period 1: DCV 60 mg/PO/QD for 7 days;<br>Period 2: telaprevir 500 mg/PO TID or 750 mg/PO/BID on Days 1–12; DCV 20 mg/PO/QD on Days 6–12.                            |
| AI444-084/<br>USA           | Open-label, single-sequence, 2-way drug-drug interaction study                | Healthy subjects ( <i>N</i> = 15)                                                      | DCV 60 mg/PO/QD on Days 1–5 and 17–23; escitalopram 10 mg/PO/QD on Days 10–23.                                                                                      |
| AI444-093/<br>USA           | Open-label, non-randomized, one-way drug-drug interaction study               | Healthy subjects ( <i>N</i> = 14)                                                      | DCV 60 mg/PO/QD on Days 1–4, and 30 mg/PO/QD on Days 5–14.<br>Darunavir/r (800/100 mg/PO/QD) or lopinavir/r (400/100 mg/PO/BID) on Days 5–14.                       |
| AI447-009/<br>USA           | Open-label, randomized, 2-sequence, multiple-dose drug-drug interaction study | Healthy subjects ( <i>N</i> = 28)                                                      | Included: DCV 60 mg/PO/QD for 7 days followed by DCV 30 mg/PO/QD + ASV 200 mg/PO/BID .                                                                              |
| AI447-011/<br>USA           | Randomized, open-label, phase 2a efficacy and safety study                    | HCV GT1 patients (prior pegIFN non-responders; <i>N</i> = 22)                          | Included: DCV 60 mg/PO/QD + ASV 600 mg/PO/BID + pegIFN/RBV, and DCV 60 mg/PO/QD + ASV 200 mg/PO/BID + pegIFN/RBV.                                                   |
| AI447-040/<br>USA           | Open label, single-sequence, drug-drug interaction study with digoxin         | Healthy subjects ( <i>N</i> = 16)                                                      | Digoxin 0.25 mg/PO/QD on Days 1 and 16; DCV 60 mg/PO/QD and ASV 100 mg PO/BID on Days 6–20.                                                                         |

**BMS HIGHLY CONFIDENTIAL**

|                              |                                                                      |                                                                                                    |                                                                                                                                                                                                            |
|------------------------------|----------------------------------------------------------------------|----------------------------------------------------------------------------------------------------|------------------------------------------------------------------------------------------------------------------------------------------------------------------------------------------------------------|
| ANRS HC30 QUADRIH/<br>France | Phase 2, open-label, single-arm study with a PK sub-study            | HCV-HIV co-infected (focusing on patients on raltegravir, emtricitabine, and tenofovir; N = 18/20) | PK substudy: PegIFN/RBV lead-in period for 4 weeks followed by: DCV 60 mg/PO/QD + ASV 100 mg/PO/BID + pegIFN/RBV for 24 weeks                                                                              |
| HCP1005/<br>USA              | Open-label, 2-panel, randomized, 2-way safety and PK crossover study | Healthy subjects (N = 44)                                                                          | DCV 60 mg/PO/QD and simeprevir 150 mg PO/QD, each administered alone and in combination for 7 days.                                                                                                        |
| NCT02082808/<br>USA          | Single-center, open-label, 3-period crossover study                  | Healthy subjects (N = 12)                                                                          | Period 1: DCV 60 mg/PO/QD or dolutegravir 50 mg/PO/QD for 5 days;<br>Period 2: Dolutegravir 50 mg/PO/QD or DCV 60 mg/PO/QD for 5 days;<br>Period 3: DCV 60 mg/PO/QD + dolutegravir 50 mg/PO/QD for 5 days. |

*ASV asunaprevir, BID twice daily, DCV daclatasvir, DRV darunavir, GT genotype; HCV hepatitis C virus, HIV human immunodeficiency virus, LPV lopinavir, pegINF pegylated interferon, PK pharmacokinetic, PO by mouth, QD once daily, RBV ribavirin, TID three times daily, WOCBP, women of child-bearing potential.*
